# Supplementary material for: Lipase-catalyzed synthesis of azido-functionalized aliphatic polyesters towards acid-degradable amphiphilic graft copolymers
Source: Royal Society of Chemistry journal article supplement (doi:10.1039/c3sm52496e), 2013-12-04
Supplement: c3sm52496e.pdf [file c3sm52496e.pdf]

## Electronic Supplementary Information (ESI)

### Lipase-catalyzed synthesis of azido-functional aliphatic polyesters towards acid-degradable amphiphilic graft copolymers

Wan-Xia Wu, Na Wang\*, Bei-Yu Liu, Qing-Feng Deng, Xiao-Qi Yu\*

Key Laboratory of Green Chemistry & Technology, Ministry of Education, College of Chemistry, Sichuan University, Chengdu 610064, P. R. China

#### Table of contents for supporting information

*Fig. S1.*  $^1\text{H}$  NMR spectrum of 2-azido-1,3-propanediol in  $\text{CDCl}_3$ .

*Fig. S2.*  $^{13}\text{C}$  NMR spectrum of 2-azido-1,3-propanediol in  $\text{CDCl}_3$ .

*Fig. S3.* ESI-MS ( $m/z$ ) of 2-azido-1,3-propanediol.

*Fig. S4.*  $^1\text{H}$  NMR spectrum of 4-propargyloxybutyl vinyl ether in  $\text{CDCl}_3$ .

*Fig. S5.*  $^{13}\text{C}$  NMR spectrum of 4-propargyloxybutyl vinyl ether in  $\text{CDCl}_3$ .

*Fig. S6.*  $^1\text{H}$  NMR spectrum mPEG<sub>1000</sub>-acetal-alkyne of in  $\text{CDCl}_3$ .

*Fig. S7.*  $^{13}\text{C}$  NMR spectrum mPEG<sub>1000</sub>-acetal-alkyne of in  $\text{CDCl}_3$ .

*Fig. S8.*  $^{13}\text{C}$  NMR spectrum mPEG<sub>2000</sub>-acetal-alkyne of in  $\text{CDCl}_3$ .

*Fig. S9.* 2D-NMR spectra of  $\text{P}(\text{OSu}_{0.51}\text{-co-APSu}_{0.49})$  in  $\text{CDCl}_3$ .

*Fig. S10.* DSC curves of  $\text{P}(\text{OSu-co-APSu})$ .

*Fig.S11.* DSC curves of the copolyesters from dialkyl diesters and diols with varying chain lengths.

*Fig. S12.* GPC traces of mPEG and mPEG-acetal-alkyne.

*Fig.S13.* FTIR of (A) mPEG<sub>2000</sub>-acetal-alkyne, (B)  $\text{P}(\text{OSu}_{0.51}\text{-co-APSu}_{0.49})$  and (C)  $\text{P}(\text{OSu}_{0.51}\text{-co-APSu}_{0.49})\text{-g-mPEG}_{2000}$ .

*Fig.S14.* Polydispersity ( $M_w/M_n$ ) of  $\text{P}(\text{OSu}_{0.51}\text{-co-APSu}_{0.49})\text{-g-mPEG}_{2000}$  as a function of

---

\* Correspondence to: Fax./ Tel: + 86 28 85415886

N. Wang (E-mail: wnchem@scu.edu.cn), X.-Q. Yu (E-mail: xqyu@scu.edu.cn)

hydrolysis time by GPC.

*Fig.S15.*  $^1\text{H}$  NMR spectrum of acid-sensitive degradation of  $\text{P}(\text{OSu}_{0.51}\text{-co-APSu}_{0.49})\text{-g-mPEG}_{2000}$  with hydrolysis time in  $\text{CDCl}_3$ : (A) pH 5.0; (B) pH 7.4.

*Fig.S16.* TEM micrographs of the  $\text{P}(\text{OSu}_{0.51}\text{-co-APSu}_{0.49})\text{-g-mPEG}_{2000}$  micelles at pH7.4 and pH 5.0 with time.

*Fig. S17.* Size distributions of the  $\text{P}(\text{OSu}_{0.51}\text{-co-APSu}_{0.49})\text{-g-mPEG}_{2000}$  micelles at pH7.4 and pH 5.0 with time.

*Fig.S18.* Emission spectra changes of  $\text{P}(\text{OSu}_{0.51}\text{-co-APSu}_{0.49})\text{-g-mPEG}_{2000}$  micelle with pyrene at pH7.4 and pH 5.0 with time.

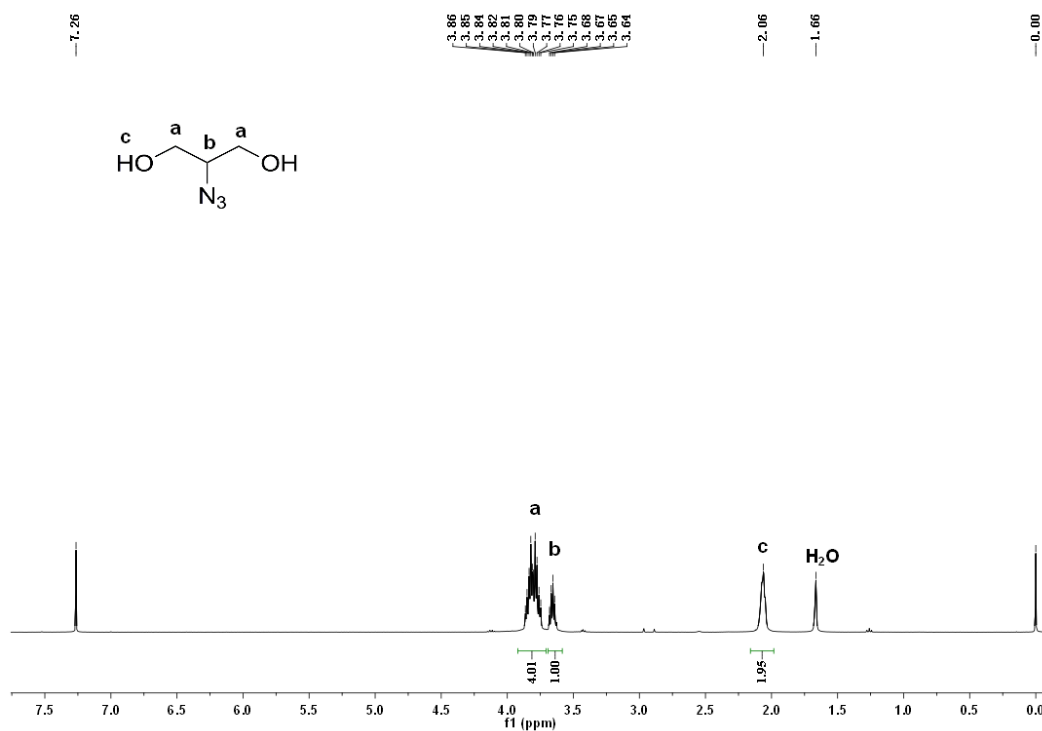

*Fig. S1.*  $^1\text{H}$  NMR spectrum of 2-azido-1,3-propanediol in  $\text{CDCl}_3$ .

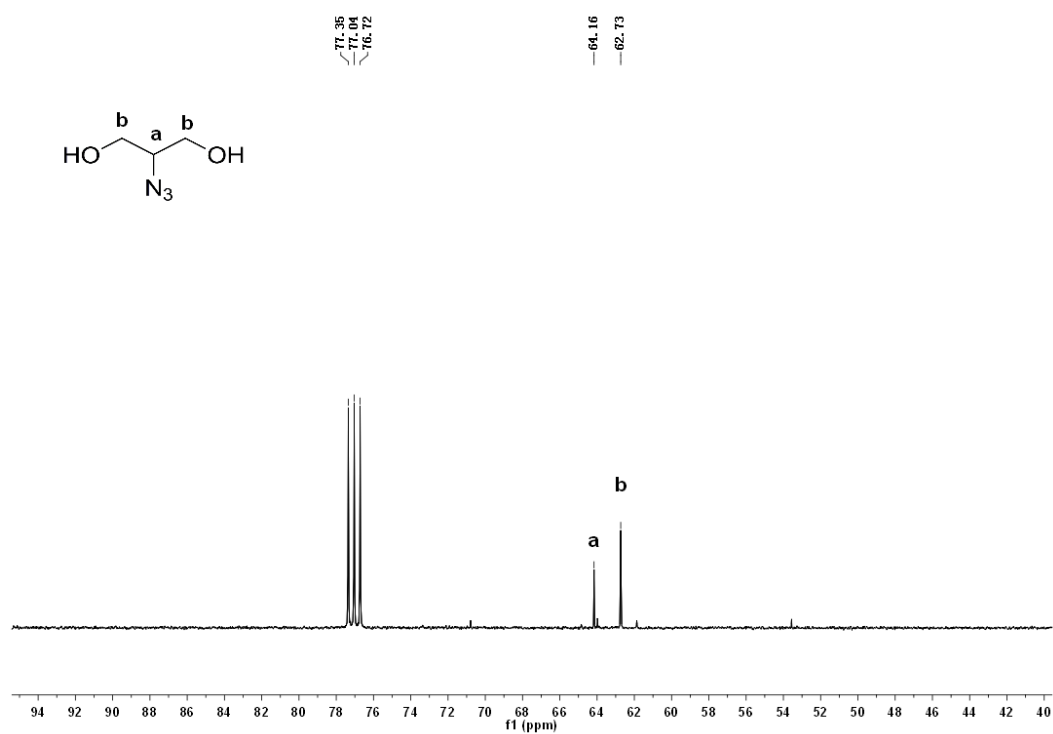

Fig. S2.  $^{13}\text{C}$  NMR spectrum of 2-azido-1,3-propanediol in CDCl<sub>3</sub>.

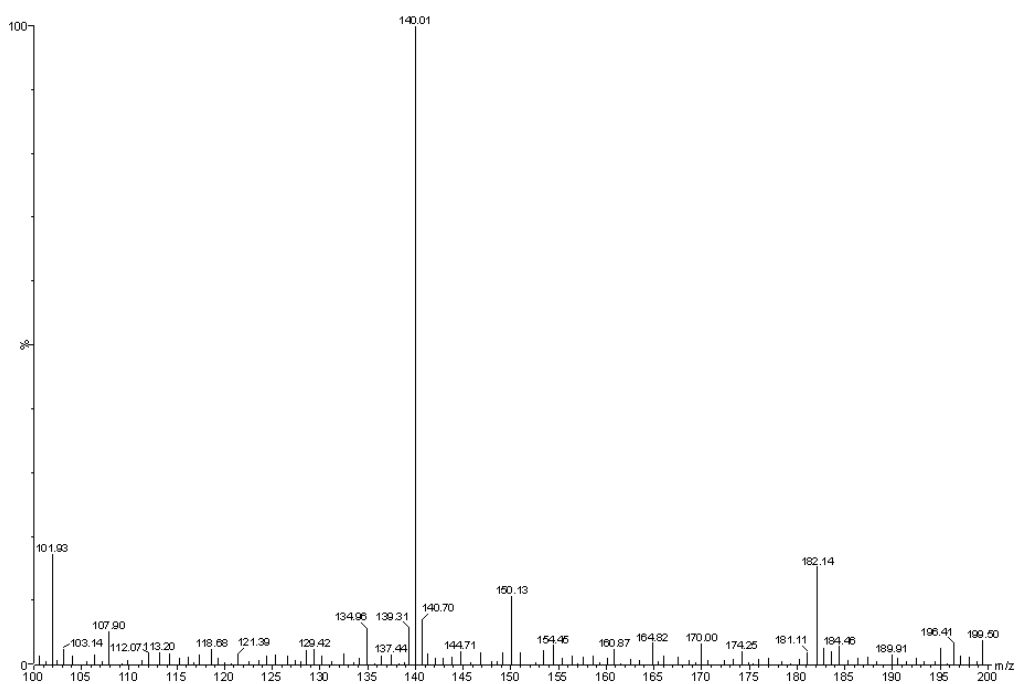

Fig. S3. ESI-MS (m/z) of 2-azido-1,3-propanediol.

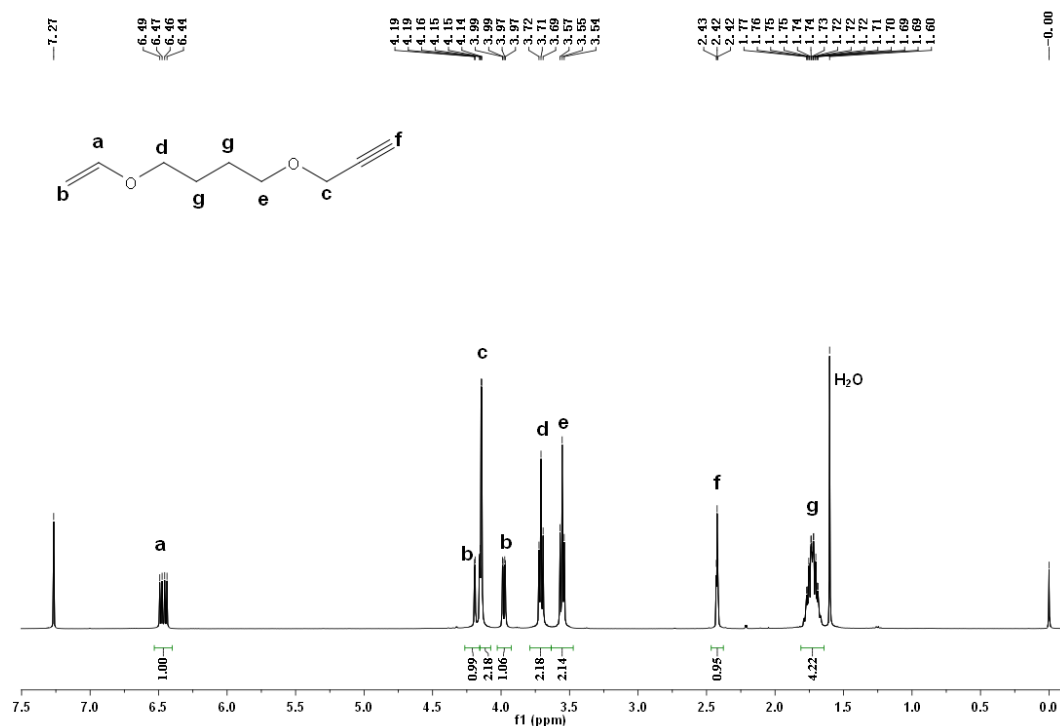

Fig. S4. <sup>1</sup>H NMR spectrum of 4-propargyloxybutyl vinyl ether in CDCl<sub>3</sub>.

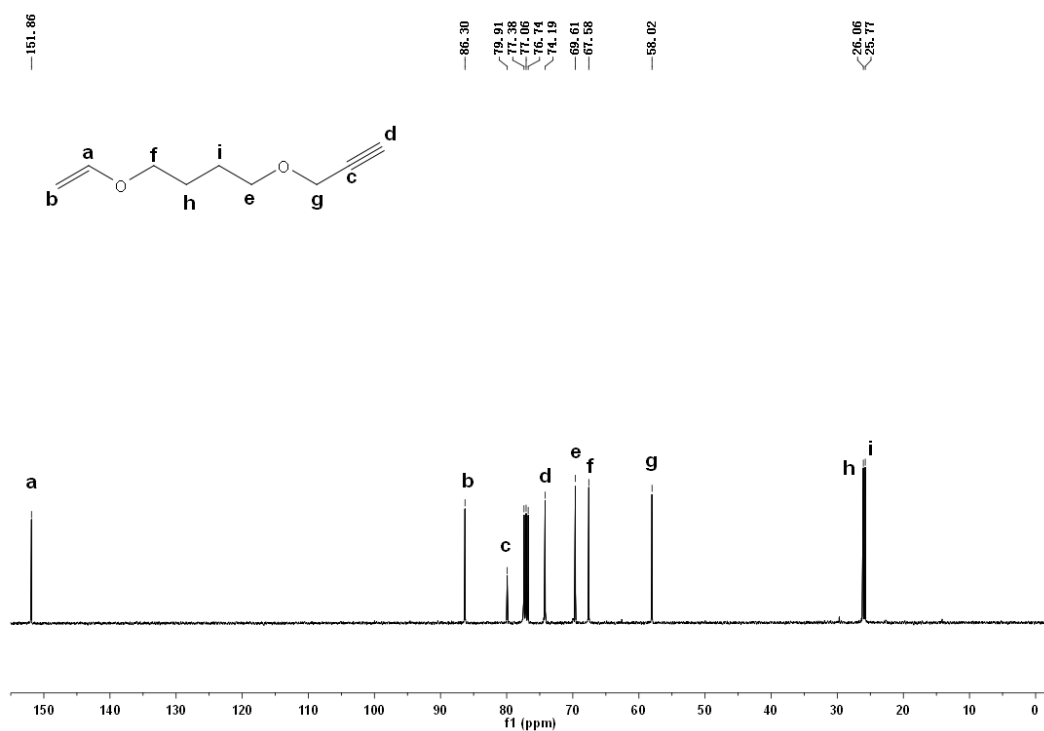

Fig. S5. <sup>13</sup>C NMR spectrum of 4-propargyloxybutyl vinyl ether in CDCl<sub>3</sub>.

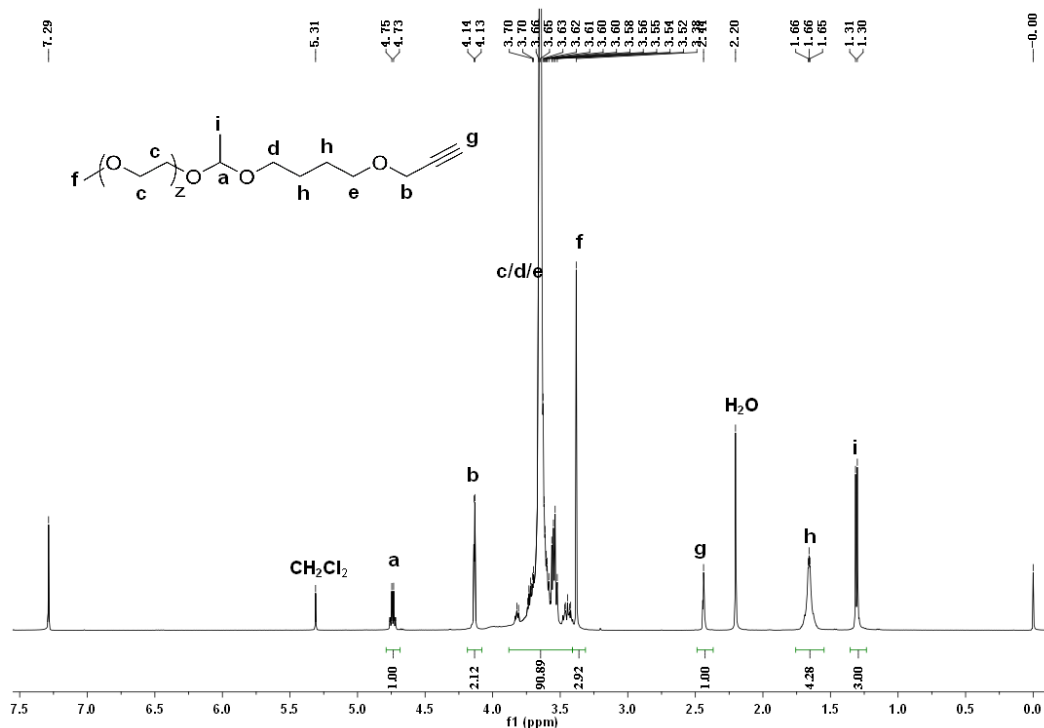

Fig. S6.  $^1\text{H}$  NMR spectrum mPEG<sub>1000</sub>-acetal-alkyne of in  $\text{CDCl}_3$ .

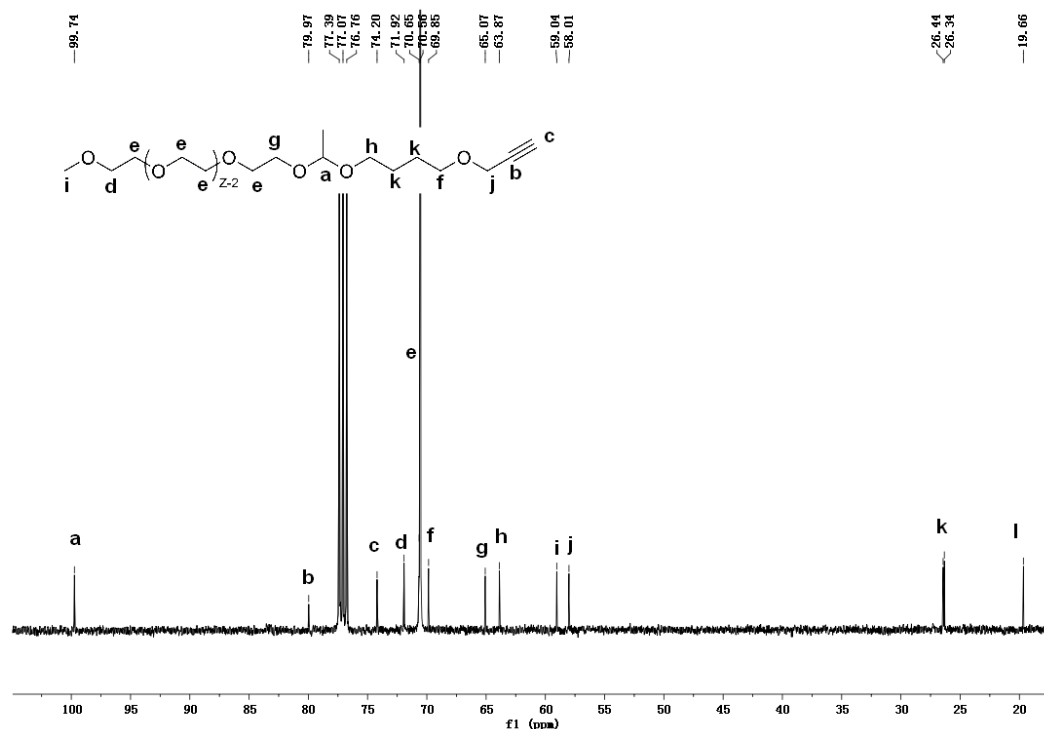

Fig. S7.  $^{13}\text{C}$  NMR spectrum mPEG<sub>1000</sub>-acetal-alkyne of in  $\text{CDCl}_3$ .

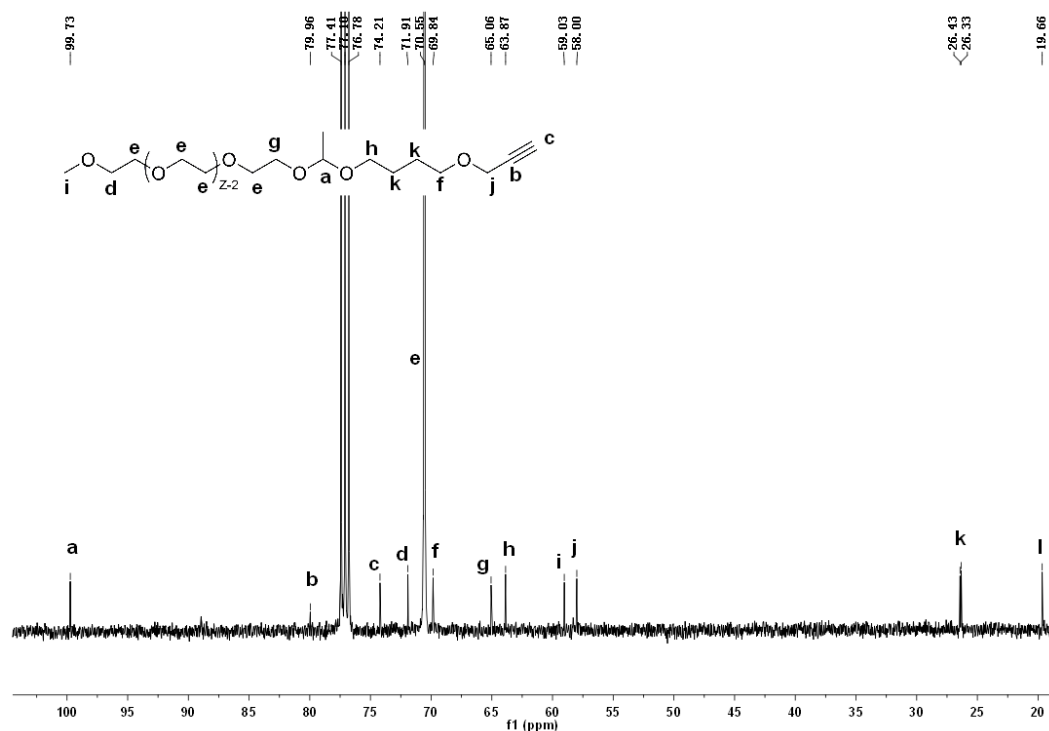

Fig. S8.  $^{13}\text{C}$  NMR spectrum mPEG<sub>2000</sub>-acetal-alkyne of in  $\text{CDCl}_3$ .

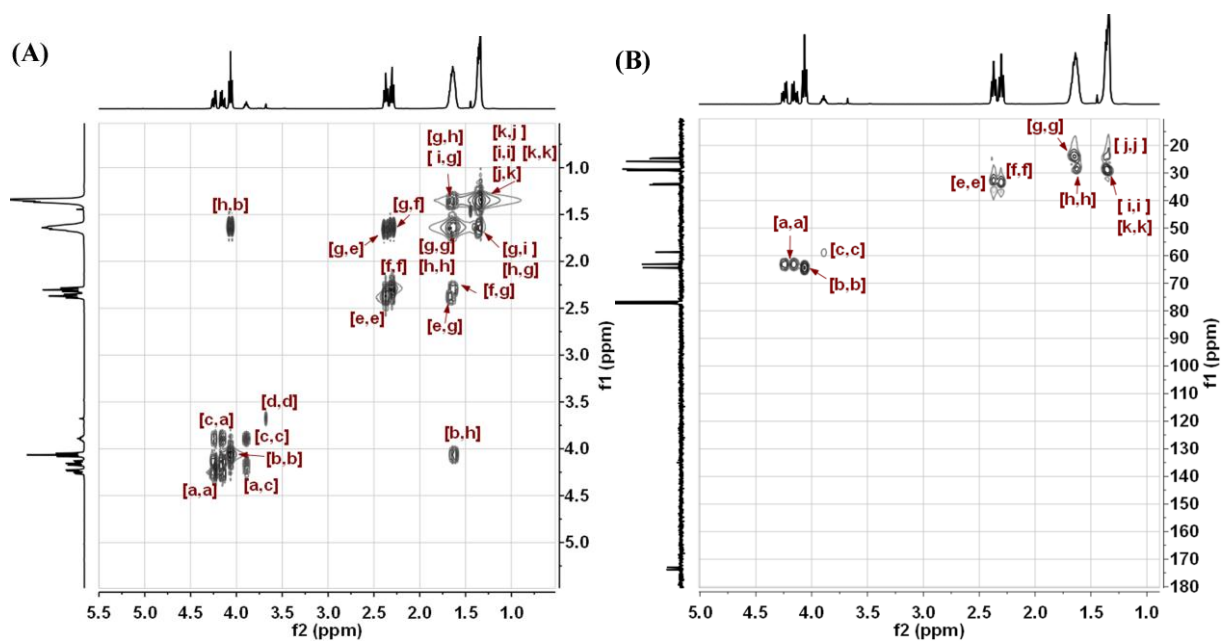

Fig. S9. 2D-NMR spectra of P(OSu<sub>0.51</sub>-co-APSu<sub>0.49</sub>) in  $\text{CDCl}_3$ : (A)  $^1\text{H}$ ,  $^1\text{H}$ -COSY spectrum; (B)  $^{13}\text{C}$ ,  $^1\text{H}$ -HSQC spectrum.

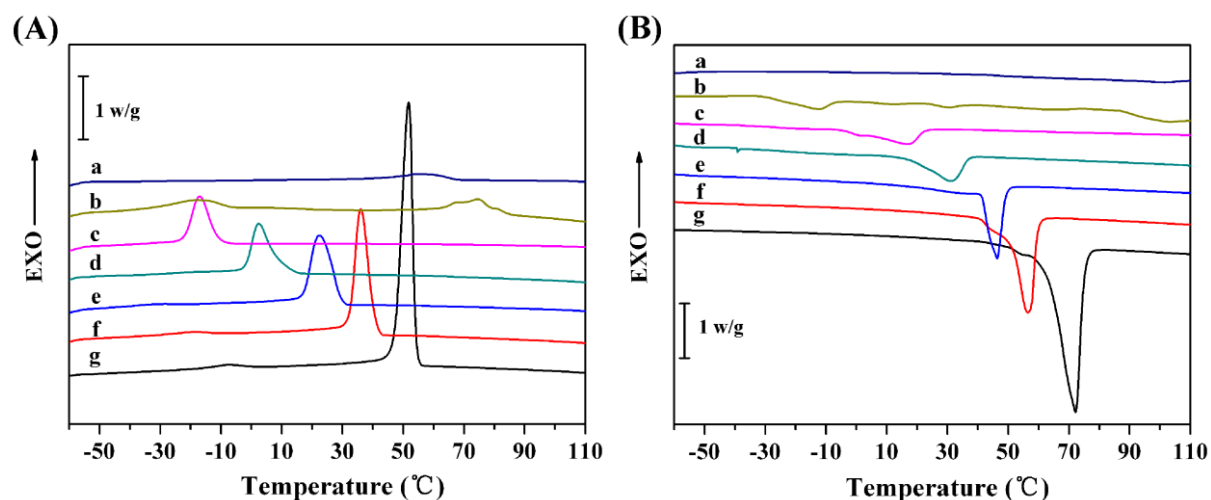

Fig. S 10. DSC curves of P(OSu-co-APSu): (A) Cooling runs at 10 °C min<sup>-1</sup>; (B) Heating runs at 10 °C min<sup>-1</sup> for (a) P(APSu), (b) P(OSu<sub>0.25</sub>-co-APSu<sub>0.75</sub>), (c) P(OSu<sub>0.36</sub>-co-APSu<sub>0.64</sub>), (d) P(OSu<sub>0.51</sub>-co-APSu<sub>0.49</sub>), (e) P(OSu<sub>0.63</sub>-co-APSu<sub>0.37</sub>), (f) P(OSu<sub>0.78</sub>-co-APSu<sub>0.22</sub>) and (g) P(OSu).

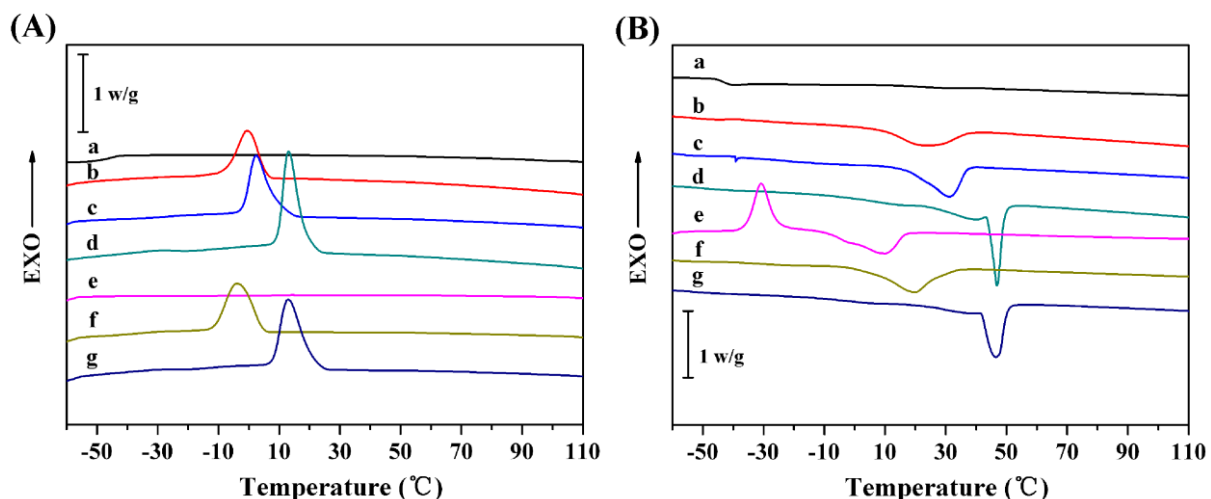

Fig. S11. DSC curves of the copolyesters from dialkyl diesters and diols with varying chain lengths: (A) Cooling runs at 10 °C min<sup>-1</sup>; (B) Heating runs at 10 °C min<sup>-1</sup> for (a) P(OSc-co-APSc), (b) P(OAd-co-APAd), (c) P(OSu-co-APSu), (d) P(OSe-co-APSe), (e) P(BSu-co-APSu), (f) P(HSu-co-APSu) and (g) P(DSu-co-APSu).

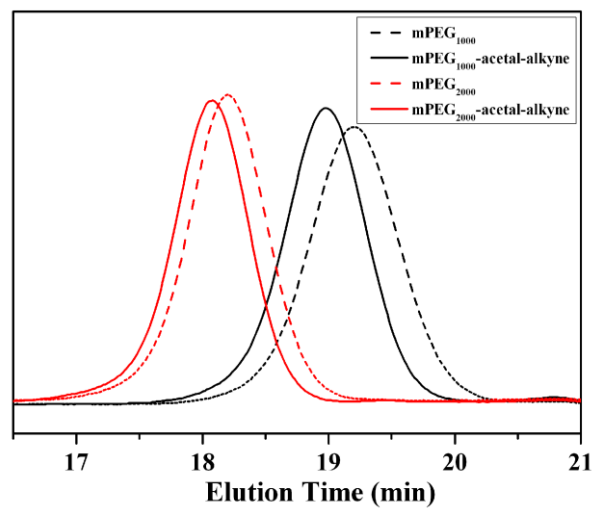

Fig. S12. GPC traces of mPEG and mPEG-acetal-alkyne .

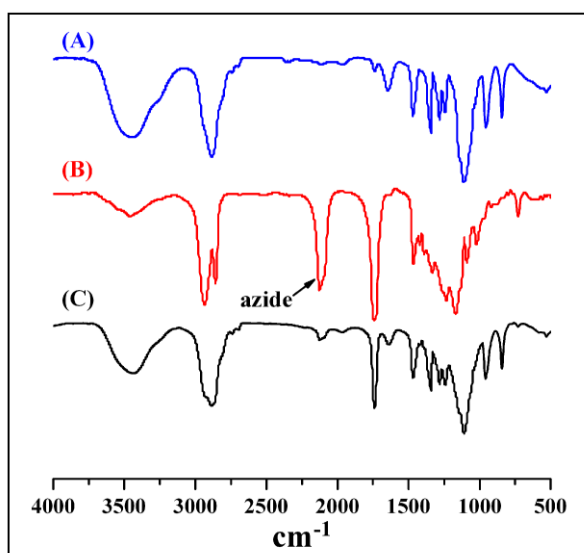

Fig.S13. FTIR of (A) mPEG<sub>2000</sub>-acetal-alkyne, (B) P(OSu<sub>0.51</sub>-co-APSu<sub>0.49</sub>) and (C) P(OSu<sub>0.51</sub>-co-APSu<sub>0.49</sub>)-g-mPEG<sub>2000</sub>.

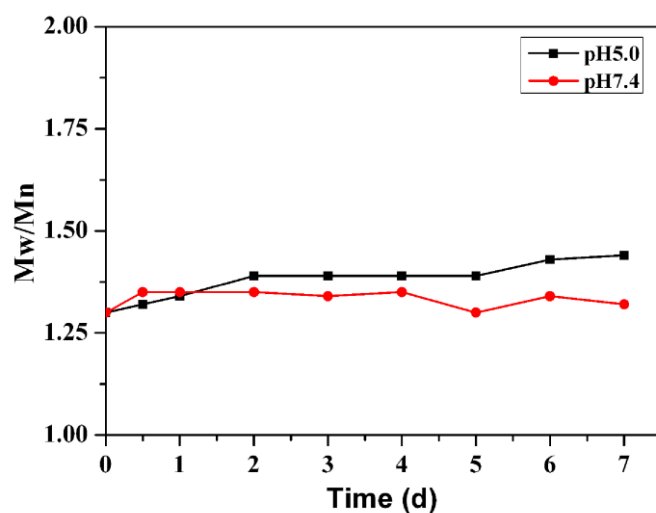

Fig. S14. Polydispersity (Mw/Mn) of P(OSu<sub>0.51</sub>-co-APSu<sub>0.49</sub>)-g-mPEG<sub>2000</sub> as a function of hydrolysis time by GPC.

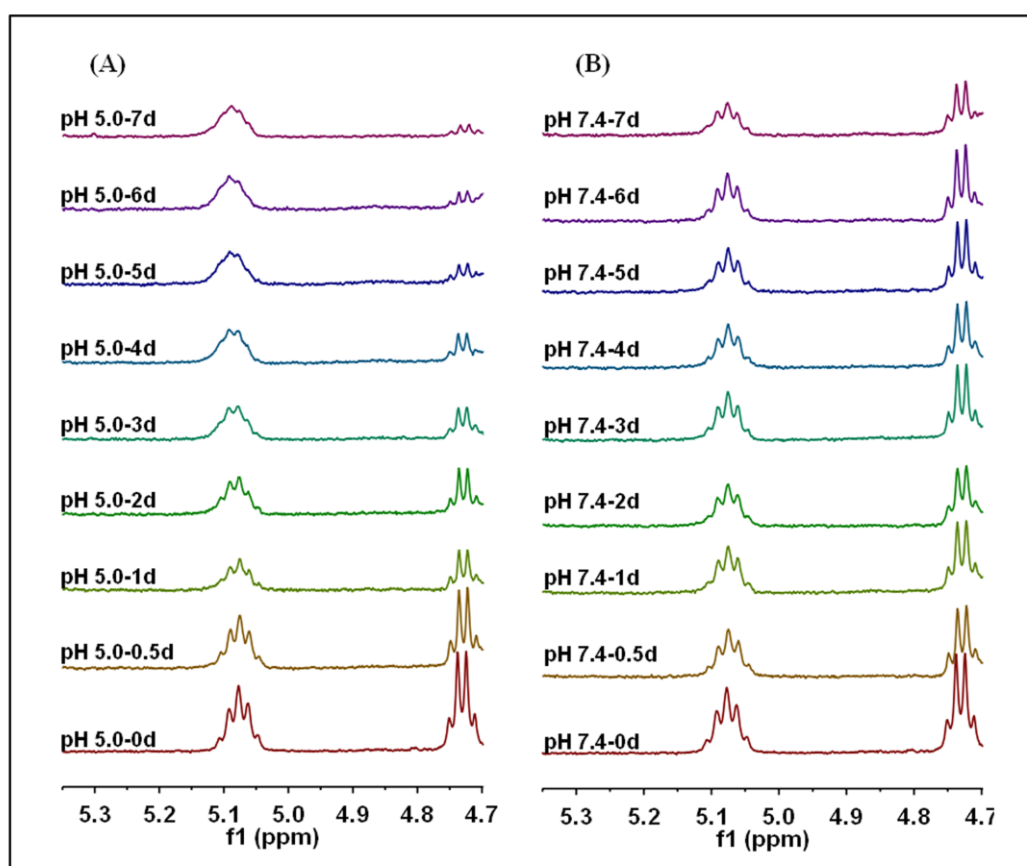

Fig. S15. <sup>1</sup>H NMR spectrum of acid-sensitive degradation of P(OSu<sub>0.51</sub>-co-APSu<sub>0.49</sub>)-g-mPEG<sub>2000</sub> with hydrolysis time in CDCl<sub>3</sub>: (A) pH 5.0; (B) pH 7.4.

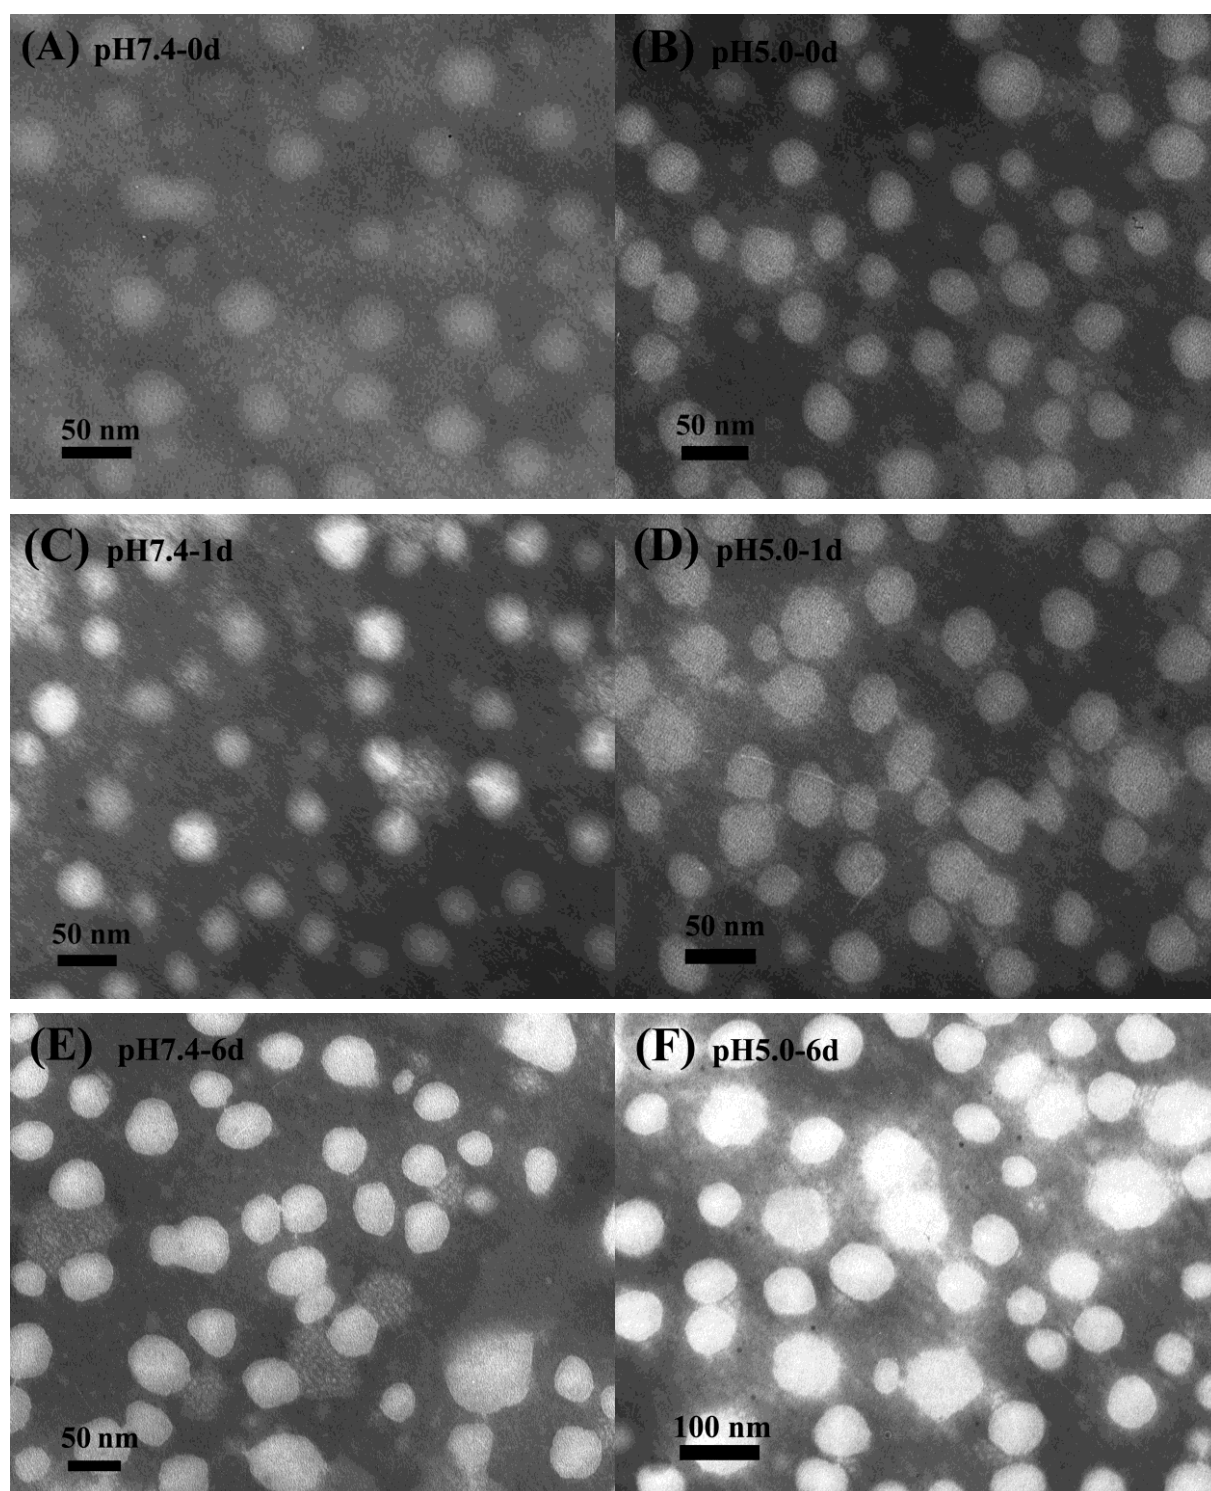

*Fig. S16.* TEM micrographs of the P(OSu<sub>0.51</sub>-co-APSu<sub>0.49</sub>)-g-mPEG<sub>2000</sub> micelles (0.5 mg mL<sup>-1</sup>) at 37°C in phosphate buffer (0.1 M) under pH 7.4 at 0 day (A); pH 7.4 after 1 day (C); pH 7.4 after 6 days (E) and in acetate buffer (0.1 M) under pH 5.0 at 0 day (B); pH 7.4 after 1 day (D); pH 7.4 after 6 days (F).

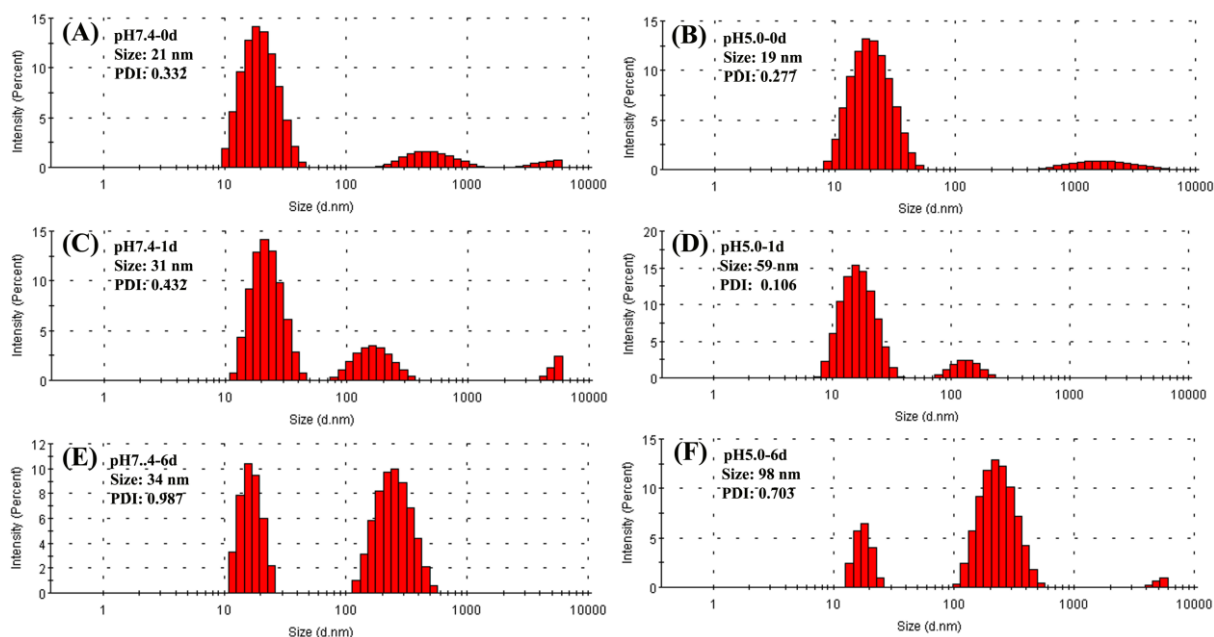

Fig. S17. Size distributions of the P(OSu<sub>0.51</sub>-co-APSu<sub>0.49</sub>)-g-mPEG<sub>2000</sub> micelles (0.5 mg mL<sup>-1</sup>) at 37°C in phosphate buffer (0.1 M) under pH 7.4 at 0 day (A); pH 7.4 after 1 day (C); pH 7.4 after 6 days (E) and in acetate buffer (0.1 M) under pH 5.0 at 0 day (B); pH 7.4 after 1 day (D); pH 7.4 after 6 days (F) determined by DLS.

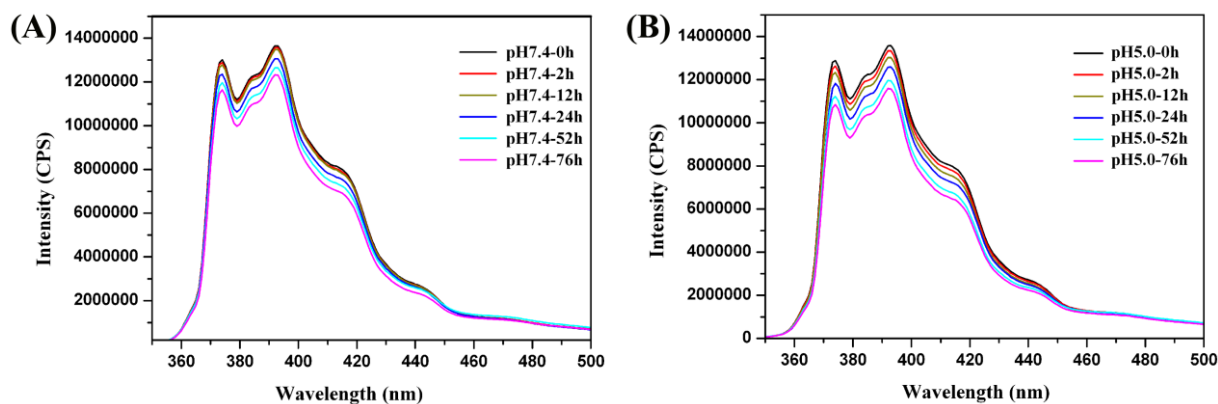

Fig. S18. Emission spectra changes of P(OSu<sub>0.51</sub>-co-APSu<sub>0.49</sub>)-g-mPEG<sub>2000</sub> (0.1 mg mL<sup>-1</sup>) micelle with pyrene (0.25 mg L<sup>-1</sup>) excited at 335 nm at different time at pH 7.4 (A) and pH 5.0 (B).
